# Supplementary material for: Establishment and characterization of functional sheep endometrial luminal epithelial organoids
Source: Research Square preprint supplement (doi:10.21203/rs.3.rs-6818248/v1), 2025-07-14
Supplement: Supplementary file 1 [file 056a5edaf9b21c6482e3eac5.docx]

Figure S1


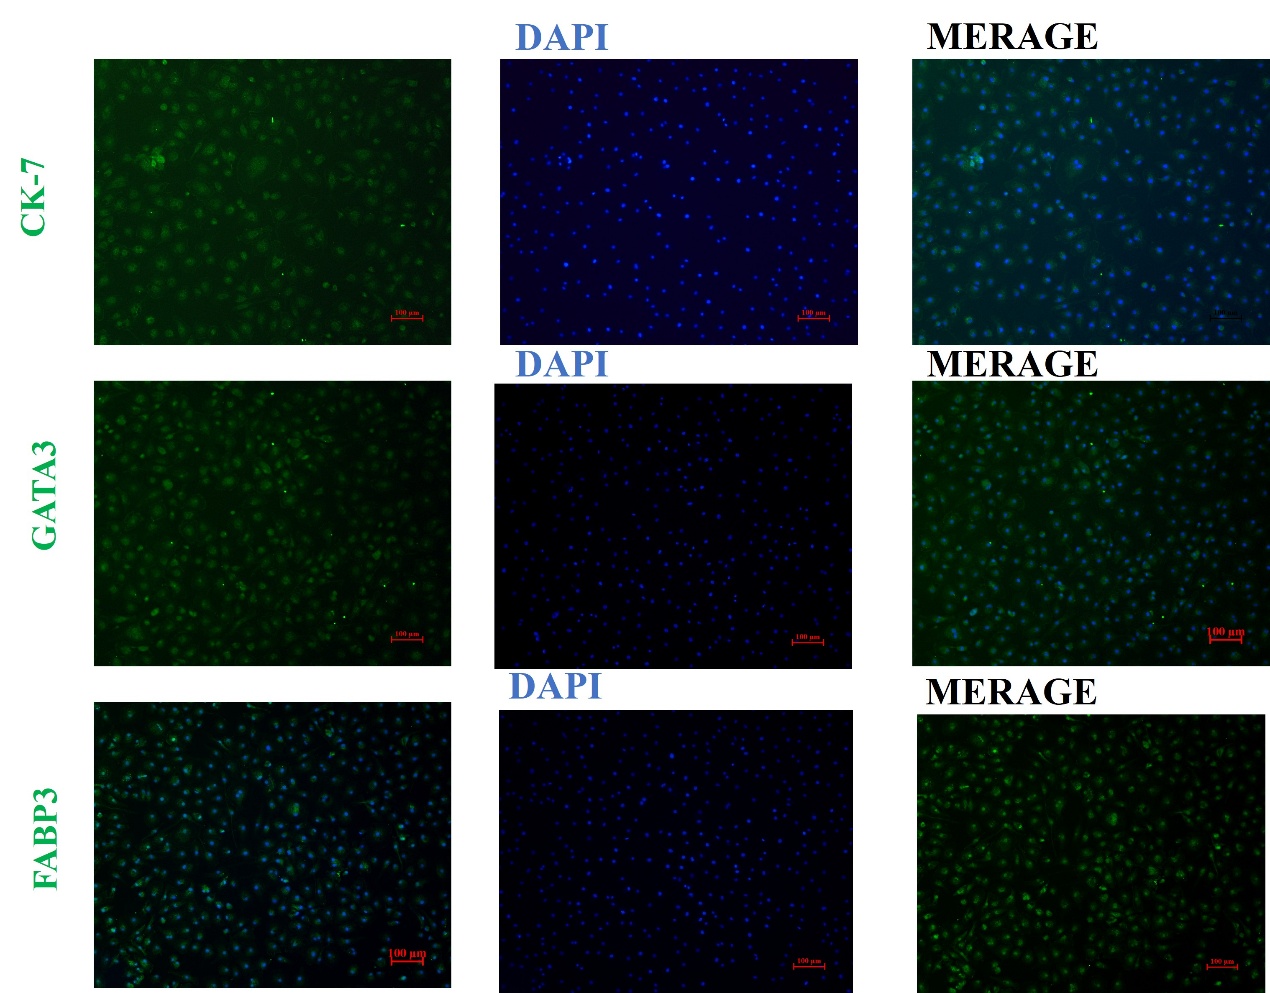


**Figure S2. Identification of ovine trophoblast cells by immunohistochemical markers.**
Positive staining for CK-7, GATA3, and FABP3 confirms trophoblast cell identity.
